# Supplementary material
Source: PubMed Central journal article supplement (PMC9647736)
Supplement: PEDS_2021054268DSupplementaryData.pdf [file PEDS_2021054268DSupplementaryData.pdf]

**SUPPLEMENTAL MATERIAL**

**Supplemental Table 1. Topics of Requested Consultation from Educational Organizations to the CMKC COVID-19 Task Force<sup>a</sup>**

| <b>Topic</b>                                                                                                     | <b>229</b>  |
|------------------------------------------------------------------------------------------------------------------|-------------|
| Screening                                                                                                        | 35 (15.3%)  |
| Emotional health                                                                                                 | 28 (12.2%)  |
| Environmental health                                                                                             | 49 (21.4%)  |
| Physical distancing                                                                                              | 37 (16.2%)  |
| Hand hygiene                                                                                                     | 18 (7.9%)   |
| Masking                                                                                                          | 65 (28.4%)  |
| Symptomatic student                                                                                              | 67 (29.3%)  |
| Meals                                                                                                            | 16 (7%)     |
| Education                                                                                                        | 44 (19.2%)  |
| Other (testing, ABC Science, contact tracing, quarantine/isolation, vaccines)                                    | 111 (48.5%) |
| <sup>a</sup> Table sums to greater than 100 given a single consultation could have inquired about several topics |             |
| <sup>b</sup> Other includes vaccination questions, virtual webinar requests, and walkthrough requests            |             |

## Supplemental Methods

### School Consultation Survey Feedback

Feedback surveys were sent to 162 individuals that requested support through the COVID-19 school assistance portal and 53 surveys were completed (33% response rate).

#### Survey results:

**Did the consultation from CMKC result in your question being effectively answered?** Yes (49, 92.5%), No (1, 1.9%), Somewhat (3, 5.7%)

**Based on the CMKC consultation you requested, were changes made to your COVID-19 school implementation efforts?** Yes, implemented (40, 75.5%), No, not implemented but considered (6, 11.3%) No, and not implemented (7, 13.2%)

#### Based on the CMKC consultation, what specific changes did you make in your schools?

- Modified COVID-19 school plan (18, 45.0%),
- Provided staff education (19, 47.5%),
- Provided education to caregivers and students (7, 17.5%),
- Changed mitigation strategies (9, 22.5%),
- Factored consultation into decisions about when to return in-person learning (11, 27.5%),
- Factored consultation into decisions about when to do virtual learning (7, 17.5%),
- Factored consultation into building environmental changes (17, 42.5%),
- Changed approach to mental health response for students, families, or staff (3, 7.5%),

**How satisfied were you with the ease of accessing consultation?** Very Satisfied (48, 90.6%), Somewhat Satisfied (2, 3.8%), Neutral (1, 1.9%), Unsatisfied (0, 0.0%), Very Unsatisfied (2, 3.8%)

**How satisfied were you with the consultation response?** Very Satisfied (44, 83.0%), Somewhat Satisfied (4, 7.5%), Neutral (2, 3.8%), Unsatisfied (1, 1.9%), Very Unsatisfied (2, 3.8%)

**Supplemental Table 2. ERIC Strategies and Lessons Learned**

| <b>ERIC Strategy<sup>1</sup></b>           | <b>Lessons Learned</b>                                                                                                                                                                                                                                                                                                                                                                                                           |
|--------------------------------------------|----------------------------------------------------------------------------------------------------------------------------------------------------------------------------------------------------------------------------------------------------------------------------------------------------------------------------------------------------------------------------------------------------------------------------------|
| Building an alliance                       | <ul style="list-style-type: none"> <li>• Start with the most readily available partners, or use existing school/academic partnerships</li> <li>• Innovative strategies to bring reticent partners to the table (e.g., working with teacher unions)</li> <li>• Recognize that each school role has different skillsets and areas of focus (e.g. superintendents vs school nurses) and each needs different information</li> </ul> |
| Communities of practice                    | <ul style="list-style-type: none"> <li>• Use districts in the region or with similar characteristics (e.g., size) to help frame arguments for their constituents, make decisions, or troubleshoot regional challenges.</li> </ul>                                                                                                                                                                                                |
| Maintaining trust                          | <ul style="list-style-type: none"> <li>• Acknowledge and fix mistakes</li> <li>• Data and recommendations change rapidly – be flexible and up-to-date with current information and explain the “why” behind the change</li> </ul>                                                                                                                                                                                                |
| Formally assess implementation barriers    | <ul style="list-style-type: none"> <li>• Elicit feedback</li> </ul>                                                                                                                                                                                                                                                                                                                                                              |
| Facilitation (interactive problem solving) | <ul style="list-style-type: none"> <li>• All teach, all learn model</li> </ul>                                                                                                                                                                                                                                                                                                                                                   |

ERIC, Expert Recommendations for Implementing Change

## **REFERENCES**

1. Powell BJ, Waltz TJ, Chinman MJ, et al. A refined compilation of implementation strategies: results from the Expert Recommendations for Implementing Change (ERIC) project. *Implement Sci.* 2015;10:21.
